# Supplementary material
Source: publisher figshare collection journal article supplement (https://acs.figshare.com/ndownloader/files/5141797)
Supplement: Supplementary file 1 [file 5141797]

## **A Simple Biomimetic Synthesis of *dl*-Chamaejasmine, a Unique 3,3'-Biflavanone**

Wei-Dong Z. Li\* and Bao-Chun Ma

*State Key Laboratory of Applied Organic Chemistry, Lanzhou University, Lanzhou 730000, China*

### **Table of Contents**

|                                                                                                                                                         |         |
|---------------------------------------------------------------------------------------------------------------------------------------------------------|---------|
| 1. General procedure .....                                                                                                                              | S2      |
| 2. Typical procedures for the preparation of substituted chalcones and the corresponding flavanones .....                                               | S2–S3   |
| 3. Typical procedures for the preparation of substituted 3-haloflavanones .....                                                                         | S3–S4   |
| 4. Physical and spectral data of substituted 3-haloflavanones.....                                                                                      | S5–S9   |
| 5. Typical procedures for the reductive dimerization of 3-iodoflavanones .....                                                                          | S9–S10  |
| 6. Physical and spectral data of 3,3'-biflavanones .....                                                                                                | S10–S12 |
| 7. Global demethylation and synthesis of <i>dl</i> -chamaejasmine ( <b>1</b> ) .....                                                                    | S12–S14 |
| 8. X-ray crystallographic data (Table 1) of tetramethyl ether <i>dl</i> - <b>13</b> .....                                                               | S15     |
| 9. High resolution FTMS (SIMS) data collection (Table 2) of some typical 3-haloflavanones—observation of dehalogenative dimeric product formation ..... | S16     |
| 10. FT-HRMS spectrum of 3-halogenated flavanone derivatives.....                                                                                        | S17–S23 |

## Experimental

### General

For product purification by flash column chromatography, silica gel (200~300 mesh) and light petroleum ether (bp. 60~90 °C) are used. All solvents were purified and dried by standard techniques, and distilled prior to use. All organic extracts were dried over Na<sub>2</sub>SO<sub>4</sub>, unless otherwise noted. IR spectra were recorded on a *Nicolet* FT-170SX spectrometer as liquid film. <sup>1</sup>H and <sup>13</sup>C NMR spectra were taken on a *Bruker* AM-200, AM-400 and Varian mercury 300 MHz spectrometer with TMS as an internal standard and CDCl<sub>3</sub> as solvent unless otherwise noted. EI-MS was obtained on HP-5988A GC/MS instrument. FAB-MS was measured on VG ZAB-HS instrument. HRMS were determined on a *Bruker Daltonics* APEXII 47e FT-ICR spectrometer. For liquid secondary ion mass spectrometry (LSIMS), Cs<sup>+</sup> ion beam (2 mA) was used at 10000 V and analytical cell vacuum was 2 × 10<sup>-9</sup> mba. Preparative TLC purification was performed on silica gel GF<sub>254</sub> TLC plates (20 cm × 20 cm, 0.5–1.0 mm). Melting points were measured on *Kofler* hot stage and are uncorrected.

All moisture-sensitive reactions were performed in flame-dried glassware under stream of nitrogen. Other commercially obtained reagents and solvents were used as received without further purification unless indicated otherwise.

Substituted 2-hydroxyl chalcones and the corresponding flavanones were synthesized according to standard literature methods,<sup>1</sup> or by the following general procedures, respectively.

#### *Typical procedure for the preparation of substituted 2-hydroxyl chalcones*

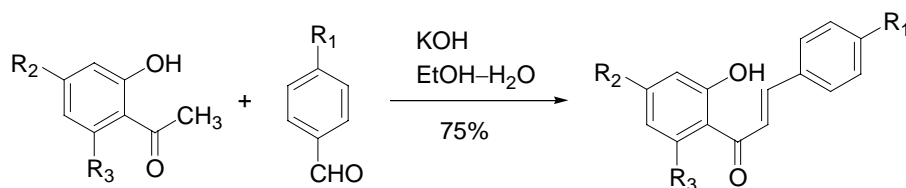

A mixture of substituted acetophenol substrate (10 mmol) and substituted benzaldehyde derivative (12 mmol) in 20 mL of EtOH was treated with a solution mixture of KOH (ca. 10 g) in H<sub>2</sub>O (8 mL) and EtOH (10 mL) at 0 °C by dropwise

<sup>1</sup> (a) Geissman, T. A.; Clinton, R. O. *J. Am. Chem. Soc.* **1946**, 68, 697. (b) Seshadri, T. R. In *The Chemistry of Flavonoid Compounds*, Geissman, T. A.; Ed., Chapter 6 (Interconversions of Flavonoid Compounds), p. 156–196; MacMillan: New York, 1962.

addition. The reaction mixture was stirred at rt. for 36 h, then poured onto ice-water (100 mL), acidified with conc. HCl to pH 2, the precipitates were filtered, and dried. Recrystallization of the crude product from EtOH gave the corresponding 2-hydroxy chalcone derivatives as colorless crystals in generally good yield (ca. 75%).

*Typical procedure for the preparation of substituted flavanone derivatives from the corresponding chalcone precursors*

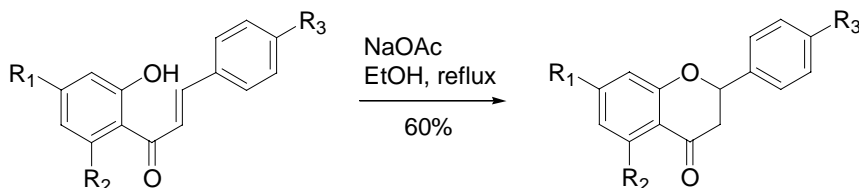

A mixture of substituted 2-hydroxy chalcone (10 mmol) and anhydrous NaOAc (2.0 g) in 30 mL of 95% ethanol was brought to reflux for ca. 48 h. The reaction mixture was then cooled; 20 mL of water was added, and extracted with EtOAc (50 mL  $\times$  3). The organic layer was washed with water, brine and dried. Evaporation of the solvent followed by purification by silica gel chromatography gave flavanone as solids in ca. 60% yield (depending on the conversion of the starting chalcone employed).

*Experimental procedures for the preparation of 3-halogenated flavanone derivatives*

#### Method-A<sup>2</sup>

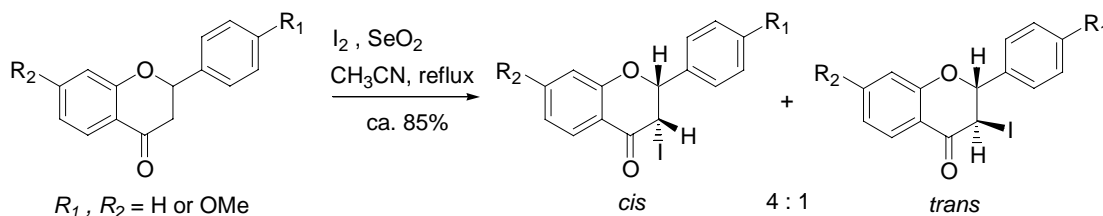

*A representative procedure of this method is as follows:*

To a solution of flavanone (**5a**,  $R_1 = R_2 = \text{H}$ , 1.56 g, 6.95 mmol) in anhydrous  $\text{CH}_3\text{CN}$  (10 mL) was added portionwise  $\text{I}_2$  (0.77 g, 3.82 mmol, 0.55 equiv) and  $\text{SeO}_2$  (0.42 g, 3.82 mmol, 0.55 equiv) successively at room temperature. The reaction mixture was then refluxed for ca. 8 h, cooled to rt., filtered through a pad of silica gel. The filtrate was taken in water and extracted with EtOAc (30 mL  $\times$  3). The organic layers were

<sup>2</sup> Bekaert, A.; Barberan, O.; Gervais, M.; Brion, J. -D. *Tetrahedron Lett.* **2000**, 41, 2903.

combined, washed with aqueous Na<sub>2</sub>S<sub>2</sub>O<sub>3</sub>, water, brine, and dried. Evaporation of the solvent in vacuo followed by silica gel chromatographic purification (Petrol. Ether : EtOAc 50:1) gave the corresponding 3-iodoflavanone **5** (*cis* and *trans*) as light-sensitive solids: *trans* isomer (0.55 g) and *cis* isomer (2.23 g) in an overall yield of 85% in a ratio of ca. 1 : 4.

3-Iodoflavanones **7** and **8** (*cis* and *trans* isomers)<sup>3</sup> were prepared by the above procedure, 3-iodoflavanone **9** (*cis* and *trans* isomers) was prepared by the following Method-B.

#### Method-B<sup>4</sup>

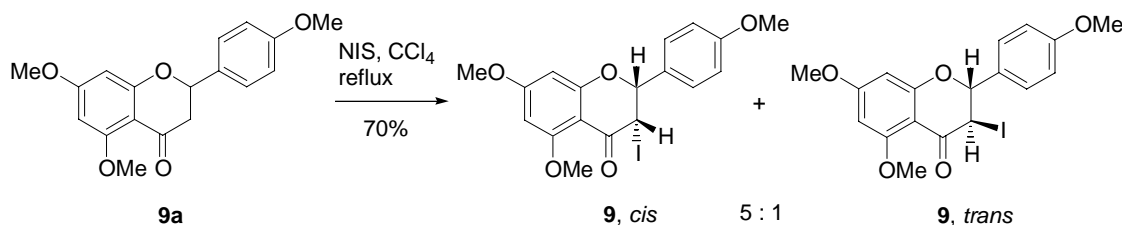

A mixture of naringenin trimethyl ether (**9a**, 0.94 g, 3.0 mmol) and NIS (0.61g, 2.7 mmol, 0.9 equiv) in anhydrous CCl<sub>4</sub> (50 mL) was refluxed for 6 h under N<sub>2</sub>. The resulting reaction mixture was cooled and filtered through a pad of Celite. The filtrate was diluted with EtOAc (30 mL), then washed with water, brine, and dried. Evaporation of the solvent followed by silica gel chromatography purification (Petrol. Ether : EtOAc 20:1) gave 3-iodonaringenin trimethyl ethers **9**: *trans* isomer (0.15 g) and *cis* isomer (0.77 g) as solids in an overall yield of 70% in a ratio of ca. 1: 5.

#### Method-C<sup>5</sup> (preparation of 3-bromoflavanone derivatives)

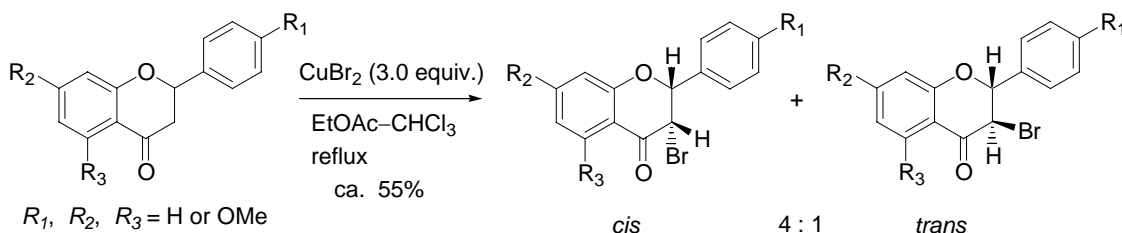

A representative procedure of this method is as follows:

<sup>3</sup> The isomeric ratio varies for different flavanone substrates, but *cis* isomer is predominated.

<sup>4</sup> Khare, V. B.; Kulkarni, A. B. *Indian J. Chem.* **1974**, 12, 1134.

<sup>5</sup> Mahajan, P. Y.; Kamat, M. S.; Kulkarni, A. B. *Indian J. Chem.* **1970**, 8, 310.

To a stirred mixture of the naringenin trimethyl ether (**9a**,  $R_1 = R_2 = R_3 = \text{OMe}$ , 0.315 g, 1.0 mmol) in 10 mL of ethyl acetate–chloroform (v/v, 3:2) was added cupric bromide (0.67 g, 3.0 mmol, 3 equiv) in one portion and the resulting mixture was brought to reflux for ca. 8 h, cooled to rt., filtered through a pad of Celite, and washed with ethyl acetate. The filtrate was evaporated under reduced pressure and followed by careful silica gel chromatography purification (Petrol. Ether : EtOAc 50:1) to give 3-bromonaringenin trimethyl ethers as light-sensitive solids: *trans* isomer (43 mg) and *cis* isomer (172 mg) in an overall yield of 55% in a ratio of 1 : 4.

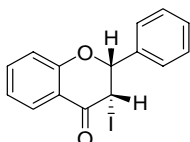

*cis*-3-Iodoflavanone (*cis*-**5**), mp. 122–123 °C (EtOAc–petrol. Ether); IR (KBr,  $\text{cm}^{-1}$ )  $\nu_{\text{max}}$  2990, 1682, 1303, 1223, 757;  $^1\text{H}$ -NMR (200 MHz,  $\text{CDCl}_3$ )  $\delta$  4.66 (1H, d,  $J = 2.0$  Hz, H-3); 4.86 (1H, d,  $J = 2.0$  Hz, H-2); 7.05 (2H, dd,  $J = 8.0$ ; 1.4 Hz); 7.65 (5H, m); 8.02 (2H, dd,  $J = 8.0$ ; 1.4 Hz) ppm;  $^{13}\text{C}$ -NMR (50 MHz,  $\text{CDCl}_3$ )  $\delta$  35.4, 79.6, 118.1, 122.6, 125.5, 128.4, 128.5, 128.7, 136.6, 137.0, 160.2, 187.9 ppm. EIMS ( $m/z$ , %): 350 ( $\text{M}^+$ , 10), 223 ( $[\text{M}-\text{I}]^+$ , 100), 121(17); HRMS (SIMS)  $m/z$  447.1569 ( $\{2[\text{M}-\text{I}]+\text{H}\}^+$ ); 350.9868 ( $[\text{M}+\text{H}]^+$ , calcd for  $\text{C}_{15}\text{H}_{12}\text{O}_2\text{I}$ : 350.9876); 223.0750 ( $[\text{M}-\text{I}]^+$ ).

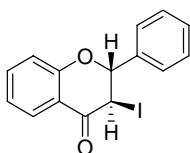

*trans*-3-Iodoflavanone (*trans*-**5**), mp. 102–103 °C (EtOAc–petrol. Ether); IR (KBr,  $\text{cm}^{-1}$ )  $\nu_{\text{max}}$  2990, 1682, 1461, 1303, 1223, 757;  $^1\text{H}$ -NMR (200 MHz,  $\text{CDCl}_3$ )  $\delta$  5.32 (1H, d,  $J = 6.8$  Hz, H-3); 5.63 (1H, d,  $J = 6.8$  Hz, H-2); 7.05 (2H, dd,  $J = 8.0$ ; 1.4 Hz); 7.36 (4H, m); 7.56 (2H, dd,  $J = 8.0$ ; 1.4 Hz); 7.91 (1H, dd,  $J = 8.0$ ; 1.4 Hz) ppm; EIMS ( $m/z$ , %): 350 ( $\text{M}^+$ , 10), 223 ( $[\text{M}-\text{I}]^+$ , 100), 121 (17); HRMS (SIMS)  $m/z$  447.1596 ( $\{2[\text{M}-\text{I}]+\text{H}\}^+$ ); 350.9882 ( $[\text{M}+\text{H}]^+$ , calcd for  $\text{C}_{15}\text{H}_{12}\text{O}_2\text{I}$ : 350.9876); 223.0754 ( $[\text{M}-\text{I}]^+$ ).

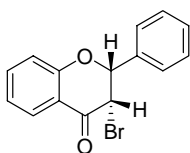

*cis*-3-Bromoflavanone, mp. 109–111 °C (EtOAc–petrol. Ether); IR ((KBr,  $\text{cm}^{-1}$ )  $\nu_{\text{max}}$  2956, 1698, 1373, 1294, 1193, 848;  $^1\text{H}$ NMR (200 MHz,  $\text{CDCl}_3$ )  $\delta$  4.57 (1H, d,  $J = 1.8$  Hz, H-3); 5.43 (1H, s, br, H-2); 7.05 (2H, dd,  $J = 7.8$ ; 1.6 Hz); 7.46 (6H, m); 7.95 (1H, dd,  $J = 8.0$ ; 1.8 Hz) ppm; EIMS ( $m/z$ , %): 302 ( $\text{M}^+$ , 8), 223 ( $[\text{M}-\text{Br}]^+$ , 61), 121 (100).

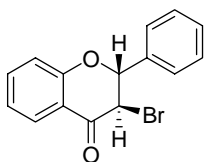

*trans*-3-Bromoflavanone, mp. 90–92 °C (EtOAc–petrol. Ether); IR ((KBr,  $\text{cm}^{-1}$ )  $\nu_{\text{max}}$  2930, 1705, 1459, 1294, 1228, 763;  $^1\text{H}$  NMR (200 MHz,  $\text{CDCl}_3$ )  $\delta$  5.01 (1H, d,  $J = 8.6$  Hz, H-3); 5.59 (1H, d,  $J = 8.6$  Hz, H-2); 7.08 (2H, d,  $J = 7.8$  Hz); 7.41 (5H, m); 7.57 (1H, m, H-6); 7.94 (1H, d,  $J = 7.8$  Hz) ppm;  $^{13}\text{C}$  NMR (75 MHz,  $\text{CDCl}_3$ )  $\delta$  51.5, 83.9, 118.0, 119.0, 122.4, 127.2, 128.1, 128.9, 129.3, 136.2, 137.0, 160.0, 185.3 ppm; HRMS (SIMS)  $m/z$  447.1603 ( $\{2[\text{M}-\text{Br}]+\text{H}\}^+$ ); 303.0020 ( $[\text{M}+\text{H}]^+$ , calcd for  $\text{C}_{15}\text{H}_{12}\text{O}_2\text{Br}$ : 303.0015); 223.0755 ( $[\text{M}-\text{Br}]^+$ ).

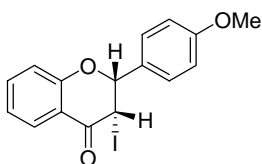

*cis*-4'-Methoxy-3-iodoflavanone (*cis*-7), mp. 121–123 °C (EtOAc–petrol. Ether); IR ((KBr,  $\text{cm}^{-1}$ )  $\nu_{\text{max}}$  2924, 1686, 1462, 1254, 1179, 759;  $^1\text{H}$  NMR (300 MHz,  $\text{CDCl}_3$ )  $\delta$  3.76 (3H, s,  $\text{OCH}_3$ ); 4.57 (1H, s, br, H-3); 4.79 (1H, d,  $J = 2.2$  Hz, H-2); 6.86 (2H, d,  $J = 8.8$  Hz); 6.99 (2H, t,  $J = 8.8$  Hz); 7.28 (2H, dd,  $J = 8.4$ ; 2.0 Hz); 7.53 (1H, dd,  $J = 8.4$ ; 2.0 Hz); 7.90 (1H, dd,  $J = 8.4$ ; 2.0 Hz) ppm;  $^{13}\text{C}$  NMR (75 MHz,  $\text{CDCl}_3$ )  $\delta$  36.1, 55.2, 79.2, 113.8, 118.0, 122.4, 126.8, 128.3, 129.0, 136.4, 160.0, 160.0, 188.0 ppm; EIMS ( $m/z$ , %): 380 ( $\text{M}^+$ , 19), 253 ( $[\text{M}-\text{I}]^+$ , 100), 121(33). HRMS (SIMS)  $m/z$  507.1783 ( $\{2[\text{M}-\text{I}]+\text{H}\}^+$ ); 380.9970 ( $[\text{M}+\text{H}]^+$ , calcd for  $\text{C}_{16}\text{H}_{14}\text{O}_3\text{I}$ : 380.9982); 253.0859 ( $[\text{M}-\text{I}]^+$ ).

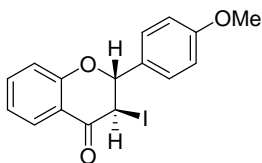

*trans*-4'-Methoxy 3-iodoflavanone (*trans*-7), mp. 106–108 °C (EtOAc–petrol. Ether); IR ((KBr,  $\text{cm}^{-1}$ )  $\nu_{\text{max}}$  2926, 1686, 1461, 1297, 1254, 758;  $^1\text{H}$  NMR (200 MHz,  $\text{CDCl}_3$ )  $\delta$  3.79 (3H,

s, OCH<sub>3</sub>); 5.31 (1H, d,  $J = 7.2$  Hz, H-3); 5.58 (1H, d,  $J = 7.2$  Hz, H-2); 6.88 (2H, d,  $J = 8.8$  Hz); 7.06 (2H, d,  $J = 8.8$  Hz); 7.42 (2H, d,  $J = 8.0$  Hz); 7.92 (1H, dd,  $J = 8.0$ ; 1.6 Hz); 7.53 (1H, m) ppm; EIMS ( $m/z$ , %): 380 ( $M^+$ , 19), 253 ( $[M-I]^+$ , 100), 121 (33).

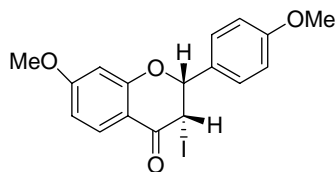

*cis*-4', 7-Dimethoxy-3-iodoflavanone (*cis*-8), mp. 138–140 °C (EtOAc–petrol. Ether); IR ((KBr, cm<sup>-1</sup>)  $\nu_{\max}$  2925, 1685, 1029, 759; <sup>1</sup>H NMR (300 MHz, CDCl<sub>3</sub>)  $\delta$  3.54 (3H, s, OCH<sub>3</sub>); 3.56 (3H, s, OCH<sub>3</sub>); 4.59 (1H, s, br, H-3); 4.81 (1H, d,  $J = 2.1$  Hz, H-2); 6.98 (2H, d,  $J = 8.8$  Hz); 7.05 (2H, d,  $J = 8.8$  Hz); 7.42 (1H, d,  $J = 2.0$  Hz); 7.53 (1H, dd,  $J = 8.4$ ; 2.0 Hz); 7.94 (1H, dd,  $J = 8.4$ ; 2.0 Hz) ppm; <sup>13</sup>C NMR (75MHz, CDCl<sub>3</sub>)  $\delta$  36.1, 55.2, 55.7, 79.7, 100.8, 111.3, 111.5, 113.8, 126.9, 129.2, 130.0, 159.7, 162.3, 166.4, 186.9 ppm; EIMS ( $m/z$ , %): 410 ( $M^+$ , 12), 283 ( $[M-I]^+$ , 100), 134 (66); HRMS (SIMS)  $m/z$  567.1996 ( $\{2[M-I]+H\}^+$ ); 411.0092 ( $[M+H]^+$ , calcd for C<sub>17</sub>H<sub>16</sub>O<sub>4</sub>I: 411.0088); 283.0968 ( $[M-I]^+$ ).

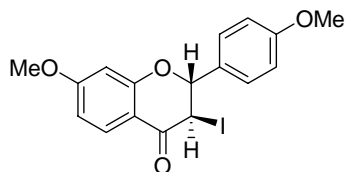

*trans*-4', 7-Dimethoxy-3-iodoflavanone (*trans*-8), mp. 154–156 °C (EtOAc–petrol. Ether); IR ((KBr, cm<sup>-1</sup>)  $\nu_{\max}$  2924, 2362, 1687, 1028, 762; <sup>1</sup>H NMR (400 MHz, CDCl<sub>3</sub>)  $\delta$  3.61 (3H, s, OCH<sub>3</sub>); 3.62 (3H, s, OCH<sub>3</sub>); 5.32 (1H, d,  $J = 7.4$  Hz, H-3); 5.58 (1H, d,  $J = 7.4$  Hz, H-2); 6.69 (2H, d,  $J = 8.8$  Hz); 7.08 (2H, d,  $J = 8.8$  Hz); 7.30 (1H, d,  $J = 2.0$  Hz); 7.56 (1H, dd,  $J = 8.4$ ; 2.0 Hz); 7.93 (1H, dd,  $J = 8.4$ ; 2.0 Hz) ppm; EIMS ( $m/z$ , %): 410 ( $M^+$ , 12), 283 ( $[M-I]^+$ , 100), 134 (66).

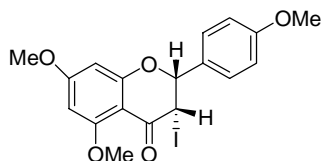

*cis*-3-Iodonaringenin trimethyl ether (*cis*-6), mp. 181–183 °C (EtOAc–petrol. Ether); IR (KBr, cm<sup>-1</sup>)  $\nu_{\max}$  2936, 1669, 1608, 1253, 1159, 831; <sup>1</sup>H NMR (200 MHz, CDCl<sub>3</sub>)  $\delta$  3.78 (3H, s, OCH<sub>3</sub>); 3.80 (3H, s, OCH<sub>3</sub>); 3.85 (3H, s, OCH<sub>3</sub>); 4.46 (1H, br s, H-3); 4.61 (1H, d,  $J = 1.8$

Hz, H-2); 6.09 (1H, d,  $J = 2.0$  Hz); 6.20 (1H, br d,  $J = 2.0$  Hz); 6.90 (2H, d,  $J = 8.8$  Hz); 7.32 (2H, d,  $J = 8.8$  Hz) ppm;  $^{13}\text{C}$  NMR (50 MHz,  $\text{CDCl}_3$ )  $\delta$  38.5, 56.1, 56.4, 56.6, 79.7, 94.4, 94.6, 103.4, 114.6, 115.0, 127.7, 128.5, 130.1, 160.5, 164.1, 164.5, 167.2, 186.3 ppm; EIMS ( $m/z$ , %): 440 ( $\text{M}^+$ , 57), 313 ( $[\text{M}-\text{I}]^+$ , 80), 121 (100); HRMS (SIMS)  $m/z$  627.2133 ( $\{2[\text{M}-\text{I}]+\text{H}\}^+$ ); 441.0154 ( $[\text{M}+\text{H}]^+$ , calcd for  $\text{C}_{18}\text{H}_{18}\text{O}_5\text{I}$ : 441.0193); 313.1036( $[\text{M}-\text{I}]^+$ ).

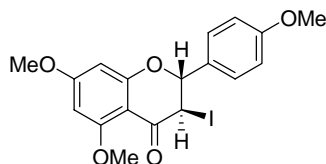

*trans*-3-Iodonaringenin trimethyl ether (*trans*-9), mp. 167–169 °C (EtOAc–petrol. Ether); IR ((KBr,  $\text{cm}^{-1}$ )  $\nu_{\text{max}}$  3935, 1670, 1607, 1250, 822;  $^1\text{H}$  NMR (200 MHz,  $\text{CDCl}_3$ )  $\delta$  3.71 (3H, s,  $\text{OCH}_3$ ); 3.76 (3H, s,  $\text{OCH}_3$ ); 3.79 (3H, s,  $\text{OCH}_3$ ); 5.06 (1H, d,  $J = 5.8$  Hz, H-3); 5.46 (1H, d,  $J = 5.8$  Hz, H-2); 6.01 (1H, d,  $J = 1.8$  Hz); 6.10 (1H, d,  $J = 1.8$  Hz); 6.78 (2H, d,  $J = 8.6$  Hz); 7.20 (2H, d,  $J = 8.6$  Hz) ppm;  $^{13}\text{C}$  NMR (50 MHz,  $\text{CDCl}_3$ )  $\delta$  32.0, 55.2, 55.6, 56.1, 84.0, 93.4, 93.5, 103.4, 113.8, 114.1, 126.8, 128.1, 128.6, 159.9, 162.7, 162.8, 166.6, 183.6 ppm; EIMS ( $m/z$ , %): 440 ( $\text{M}^+$ , 16), 313 ( $[\text{M}-\text{I}]^+$ , 100), 121 (90); HRMS (SIMS)  $m/z$  627.1986 ( $\{2[\text{M}-\text{I}]+\text{H}\}^+$ ); 441.0162 ( $[\text{M}+\text{H}]^+$ , calcd for  $\text{C}_{18}\text{H}_{18}\text{O}_5\text{I}$ : 441.0193); 313.1065 ( $[\text{M}-\text{I}]^+$ ).

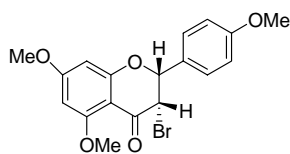

*cis*-3-Bromonaringenin trimethyl ether, mp. 139–141 °C (EtOAc–petrol. Ether); IR ((KBr,  $\text{cm}^{-1}$ )  $\nu_{\text{max}}$  2938, 1675, 1609, 1253, 1217, 834;  $^1\text{H}$  NMR (200 MHz,  $\text{CDCl}_3$ )  $\delta$  3.84 (3H, s,  $\text{OCH}_3$ ); 3.86 (3H, s,  $\text{OCH}_3$ ); 3.92 (3H, s,  $\text{OCH}_3$ ); 4.39 (1H, d,  $J = 1.6$  Hz, H-3); 5.35 (1H, s, br, H-2); 6.15 (1H, d,  $J = 2.2$  Hz); 6.26 (1H, d,  $J = 2.2$  Hz); 6.97 (2H, d,  $J = 8.8$  Hz); 7.43 (2H, d,  $J = 8.8$  Hz) ppm;  $^{13}\text{C}$  NMR (50 MHz,  $\text{CDCl}_3$ )  $\delta$  53.7, 55.2, 55.6, 56.2, 78.7, 93.4, 93.7, 102.8, 113.7, 127.3, 127.7, 159.8, 163.3, 163.8, 166.4, 183.7 ppm; EIMS ( $m/z$ , %): 392 ( $\text{M}^+$ , 29), 313 ( $[\text{M}-\text{Br}]^+$ , 100). HRMS (SIMS)  $m/z$  627.1821 ( $\{2[\text{M}-\text{Br}]+\text{H}\}^+$ ); 393.0292 ( $[\text{M}+\text{H}]^+$ , calcd for  $\text{C}_{18}\text{H}_{18}\text{O}_5\text{Br}$ : 393.0332); 313.1053 ( $[\text{M}-\text{Br}]^+$ ).

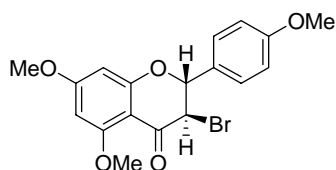



*trans*-3-Bromonaringenin trimethyl ether, mp. 177–179 °C (EtOAc–petrol. Ether); IR (KBr, cm<sup>-1</sup>)  $\nu_{\text{max}}$  2938, 1679, 1609, 1253, 1218, 821; <sup>1</sup>H NMR (200 MHz, CDCl<sub>3</sub>)  $\delta$  3.79 (3H, s, OCH<sub>3</sub>); 3.83 (3H, s, OCH<sub>3</sub>); 3.88 (3H, s, OCH<sub>3</sub>); 4.81 (1H, d, *J* = 6.8 Hz, H-3); 5.52 (1H, d, *J* = 6.8 Hz, H-2); 6.10 (1H, d, *J* = 2.2 Hz); 6.16 (1H, d, *J* = 2.2 Hz); 6.88 (2H, d, *J* = 8.6 Hz); 7.29 (2H, d, *J* = 8.6 Hz) ppm; <sup>13</sup>C NMR (50 MHz, CDCl<sub>3</sub>)  $\delta$  51.8, 55.3, 55.7, 56.2, 82.9, 93.5, 103.9, 114.2, 114.4, 128.3, 160.1, 162.8, 163.0, 166.7, 182.2 ppm; EIMS (*m/z*, %): 392 (M<sup>+</sup>, 41), 313 ([M–Br]<sup>+</sup>, 100). HRMS (SIMS) *m/z* 393.0376 ([M+H]<sup>+</sup>, calcd for C<sub>18</sub>H<sub>18</sub>O<sub>5</sub>Br: 393.0332); 313.1053 ([M–Br]<sup>+</sup>).

*Reductive dimerization of 3-iodoflavanone 5 to dl-6 mediated by metallic indium*

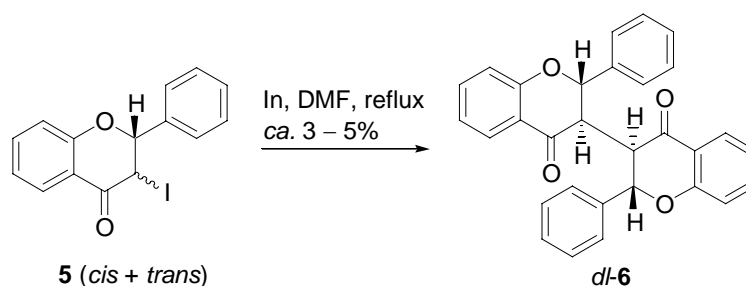

A mixture of *trans*- and *cis*-3-iodoflavanones **5** (700 mg, 2.0 mmol) and indium powder (230 mg, 2.0 mmol) in dry DMF (5 mL) was brought to reflux under nitrogen for 6 h. The reaction mixture was diluted with EtOAc and filtered. The filtrate was washed successively with water, brine, and dried. Evaporation of the solvent followed by silica gel chromatography purification and further preparative TLC purification with benzene as solvent gave the dehalogenated dimer 3,3'-biflavanone *dl*-**6** (23 mg, 0.052 mmol, ca. 5%), along with the corresponding flavanone (25 mg, 5%, reductive dehalogenation), flavone (90 mg, 20%, dehydrohalogenation), and chalcone (110 mg, 25%) derivatives.

Reductive dimerization of substituted 3-iodoflavanones **5**, **7**, **8** and **9** to the corresponding *dl*-3,3'-biflavanones **6**, **10**, **11** and **12** respectively induced by metallic lanthanum

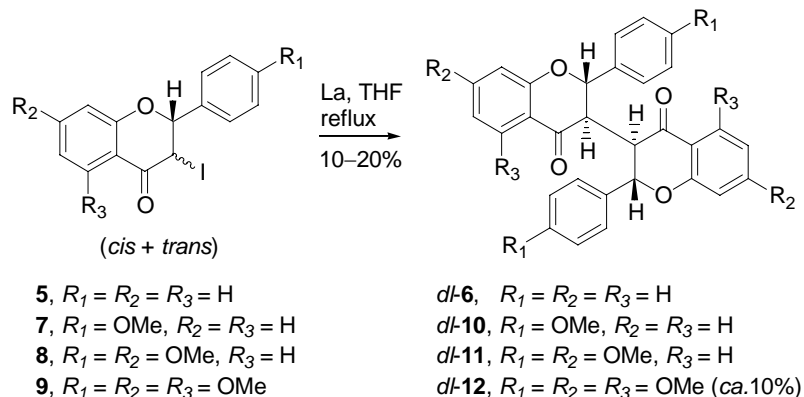

Typical experimental procedure is as follows:

A mixture of *trans*- and *cis*-3-iodoflavanones **5** (1.05 g, 3.0 mmol) and lanthanum turnings (139 mg, 1.0 mmol) in anhydrous THF (3 mL) was refluxed under nitrogen atmosphere for 2 h. The reaction was then quenched by the addition of aqueous HCl (1 M, 3 mL) and extracted with EtOAc (30 mL  $\times$  3). The combined organic layers were washed with water, brine, and dried over MgSO<sub>4</sub>. The solvent was evaporated in vacuo and the residue was purified by silica gel chromatograph (Petrol. Ether : EtOAc 40:1) to give the corresponding reductive dimerization product *dl*-**6** (135 mg, ca. 20%), along with the corresponding flavanone (35 mg, 5%), flavone (65 mg, 10%), and chalcone (164 mg, 25%) derivatives.<sup>6</sup>

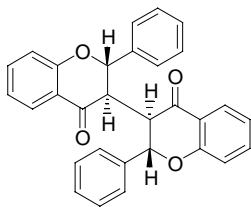

Racemate (*trans*, *trans*, *trans*)-2, 2', 3, 3'-Tetrahydro-2, 2'-bis-phenyl-(3, 3'-Bi-4H-1-benzopyran)-4, 4'-dione (*dl*-**6**), mp. 199–201 °C (EtOAc–petrol. Ether); IR ((KBr, cm<sup>-1</sup>)  $\nu_{\text{max}}$  1728, 1689, 1649, 1607, 1464, 1376, 1270; <sup>1</sup>H NMR (300 MHz, CDCl<sub>3</sub>)  $\delta$  2.82 (2H, d,  $J$  = 12 Hz, H-3, H-3'), 6.10 (2H, d,  $J$  = 12 Hz, H-2, H-2'), 7.10 (4H, m), 7.30 (10H, m), 6.94 (2H, dd,  $J$  = 8.0; 1.4 Hz), 7.92 (2H, dd,  $J$  = 8.0; 1.4 Hz) ppm; <sup>13</sup>C NMR (75 MHz, CDCl<sub>3</sub>)  $\delta$  51.3 (C-3, C-3'), 84.0 (C-2, C-2'), 117.9, 121.0, 121.6, 127.0, 127.5, 128.3, 128.9, 129.4, 136.2, 136.8, 161.3, 192.8 ppm; EIMS ( $m/z$ , %): 446 ( $M^+$ , 1), 223 ( $[M/2]^+$ , 100), 121 (36); FABMS

<sup>6</sup> An *adjusted* yield of 33% for the dimeric product *dl*-**6** was estimated based on the recovered corresponding flavanone, flavone and chalcone derivatives, which in principle could be converted readily to the starting 3-iodoflavanones.

( $m/z$ ): 447.2 ( $[M+H]^+$ ), 223 ( $[M/2]^+$ ); HRMS (SIMS)  $m/z$  447.1594 ( $[M+H]^+$ ), calcd for  $C_{30}H_{23}O_4$ : 447.1591; 469.1432 ( $[M+Na]^+$ ), calcd for  $C_{30}H_{22}O_4Na$ : 469.1410; 223.0755 ( $[M/2]^+$ ).

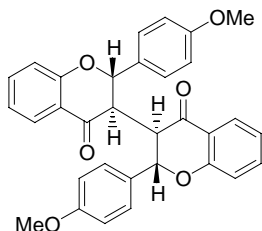

Racemate (*trans, trans, trans*)-2, 2', 3, 3'-Tetrahydro-2, 2'-bis(4-methoxyphenyl)-[3, 3'-Bi-4H-1-benzopyran]-4, 4'-dione (*dl*-**10**), yield 18% (30%),<sup>7</sup> mp. 176–178 °C (EtOAc–petrol. Ether); IR ((KBr,  $cm^{-1}$ )  $\nu_{max}$  1725, 1681, 1606, 1513, 1465, 1253;  $^1H$  NMR (300 MHz,  $CDCl_3$ )  $\delta$  2.83 (2H, d,  $J = 12$  Hz, H-3, H-3'), 3.85 (6H, s, OMe), 6.06 (2H, d,  $J = 12$  Hz, H-2, H-2'), 6.76 (4H, d,  $J = 9.3$  Hz), 6.93 (2H, d,  $J = 8.1$  Hz), 7.03 (2H, dd,  $J = 7.5$ ; 1.8 Hz), 7.07 (4H, d,  $J = 9.3$  Hz), 7.46 (2H, dd,  $J = 7.5$ ; 1.8 Hz), 7.90 (2H, d,  $J = 7.5$  Hz) ppm;  $^{13}C$  NMR (75 MHz,  $CDCl_3$ )  $\delta$  51.4 (C-3, C-3'), 55.4, 83.8 (C-2, C-2'), 114.2, 117.8, 121.0, 121.5, 127.4, 129.1, 129.2, 136.1, 160.3, 161.4, 193.0; EIMS ( $m/z$ , %): 506 ( $M^+$ ), 385, 372, 253 ( $[M/2]^+$ , 100); HRMS (ESI,  $m/z$ ): 507.1805 ( $[M+H]^+$ ), calcd for  $C_{32}H_{27}O_6$ : 507.1802; 253.0859 ( $[M/2]^+$ ).

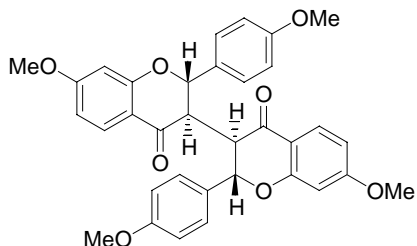

Racemate (*trans, trans, trans*)-2, 2', 3, 3'-Tetrahydro-7, 7'-dimethoxy-2, 2'-bis(4-methoxyphenyl)-[3, 3'-Bi-4H-1-benzopyran]-4, 4'-dione (*dl*-**11**), yield 15% (25%),<sup>7</sup> mp. 165–167 °C (EtOAc–petrol. Ether); IR ((KBr,  $cm^{-1}$ )  $\nu_{max}$  1727, 1671, 1607, 1513, 1247, 1160;  $^1H$  NMR (300 MHz,  $CDCl_3$ )  $\delta$  2.75 (2H, d,  $J = 12$  Hz, H-3, H-3'), 3.76 (6H, s, OMe), 3.83 (6H, s, OMe), 6.08 (2H, d,  $J = 12$  Hz, H-2, H-2'), 6.38 (2H, s), 6.58 (2H, d,  $J = 8.7$  Hz), 6.87 (4H, d,  $J = 8.1$  Hz), 7.08 (4H, d,  $J = 8.7$  Hz), 7.84 (2H, d,  $J = 9.0$  Hz) ppm;  $^{13}C$  NMR (75 MHz,  $CDCl_3$ )  $\delta$  50.9 (C-3, C-3'), 55.4, 55.6, 84.1 (C-2, C-2'), 100.6, 110.1, 114.2, 115.0, 128.3,

<sup>7</sup> Yield in parentheses refers to the *adjusted* yield (ref. 6).

129.1, 129.2, 160.3, 163.3, 166.1, 191.6 ppm; FABMS ( $m/z$ ): 589.4 ( $[M+Na]^+$ ), 567.4 ( $[M+H]^+$ ), 417.3, 283.2 ( $[M/2]^+$ ); HRMS (SIMS,  $m/z$ ): 567.2021 ( $[M+H]^+$ , calcd for  $C_{34}H_{31}O_8$ : 567.2013); 283.0966 ( $[M/2]^+$ ).

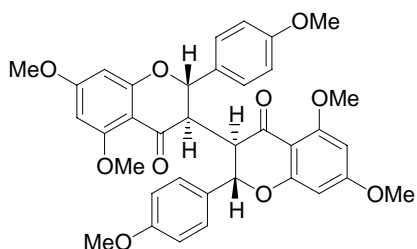

Racemate (*trans, trans, trans*)-2, 2', 3, 3'-Tetrahydro-5, 5', 7, 7'-tetramethoxy-2, 2'-bis(4-methoxyphenyl)-[3, 3'-Bi-4H-1-benzopyran]-4, 4'-dione (*dl*-chamaejasmine hexamethyl ether **12**), yield 10% (17%),<sup>7</sup> mp. 185–187 °C (EtOAc–petrol. Ether),<sup>8</sup> IR ((KBr,  $cm^{-1}$ )  $\nu_{max}$  1665, 1607, 1573, 1515, 1461, 1217;  $^1H$  NMR (300 MHz,  $CDCl_3$ )  $\delta$  2.68 (2H, d,  $J$  = 12.3 Hz, H-3, H-3'), 3.76 (6H, s, OMe), 3.85 (6H, s, OMe), 3.88 (6H, s, OMe), 6.03 (2H, d,  $J$  = 2.4 Hz), 6.04 (2H, d,  $J$  = 12.3 Hz, H-2, H-2'), 6.07 (2H, d,  $J$  = 2.4 Hz), 6.86 (4H, d,  $J$  = 9.0 Hz), 7.10 (4H, d,  $J$  = 8.7 Hz) ppm;  $^{13}C$  NMR (75 MHz,  $CDCl_3$ )  $\delta$  52.1 (C-3, C-3'), 55.3, 55.5, 56.1, 83.3 (C-2, C-2'), 93.1, 93.2, 106.3, 113.9, 129.3, 129.5, 160.0, 162.5, 164.7, 165.6, 190.1 ppm; FABMS ( $m/z$ ): 627.2 ( $[M+H]^+$ ), 447.2, 312.9 ( $[M/2]^+$ ); HRMS (SIMS,  $m/z$ ): 627.2215 ( $[M+H]^+$ , calcd for  $C_{36}H_{35}O_{10}$ : 627.2224); 313.1060 ( $[M/2]^+$ ).

*Global demethylation of dl-12 to dl-chamaejasmine (1) and partial demethylation to dl-13*

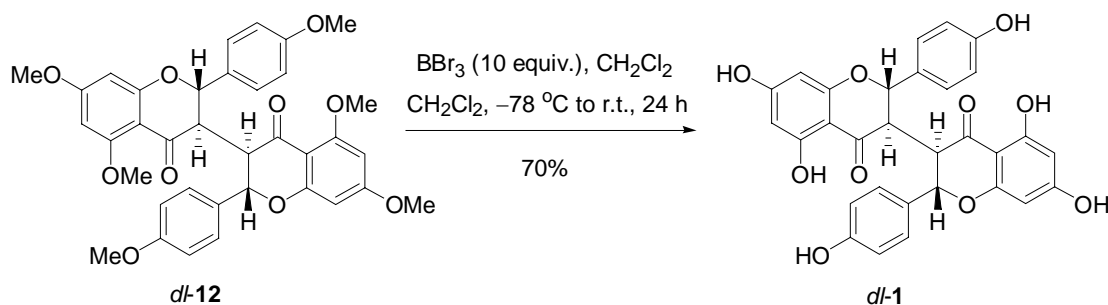

To a stirred solution of  $BBr_3$  (0.5 mL, large excess) in 5 mL of freshly distilled  $CH_2Cl_2$  at  $-78$  °C was added dropwise a solution of *dl*-**12** (30 mg, 0.048 mmol) in 3 mL of  $CH_2Cl_2$ . The resulting reaction mixture was allowed to warm up to room temperature gradually and stirred

<sup>8</sup> Nyandat, E.; Hassanali, A.; De Vicente, Y.; Multrari, G.; Galeffi, C. *Phytochemistry* **1990**, 29, 2361. A melting point of 117–119 °C (from *n*-hexane) was recorded for the partial racemate (enantiomeric ratio ca. 2:1) of (+)-(2*S*, 3*R*)-chamaejasmine hexamethyl ether therein.

for 24 h. The reaction was carefully quenched with 2 mL cold water and stirred vigorously for 2 h, extracted with EtOAc (20 mL x 6) and dried over MgSO<sub>4</sub>. Evaporation of the solvent in vacuo, the residue was purified by flash chromatograph on silica gel eluting with acetone to give *dl*-chamaejasmine (**1**) as colorless solids (18 mg, yield 70%).

Partially demethylated product *dl*-**13** was obtained (ca. 30%) when the reaction was quenched carefully at –78 °C after 1 h of addition of BBr<sub>3</sub> and usual extractive workup and chromatographic purification on silica gel. The unreacted hexamethyl ether *dl*-**12** (ca. 70%) was fully recovered.

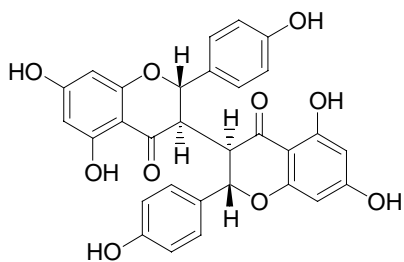

Racemate (*trans, trans, trans*)-2, 2', 3, 3'-Tetrahydro-5, 5', 7, 7'-tetrahydroxy-2, 2'-bis(4-hydroxyphenyl)-[3, 3'-Bi-4H-1-benzopyran]-4, 4'-dione (*dl*-chamaejasmine, **1**), mp. 293–295 °C (acetone);<sup>9</sup> IR (KBr, cm<sup>–1</sup>)  $\nu_{\text{max}}$  3198, 1688, 1636, 1515, 1643, 1158; <sup>1</sup>H NMR (300 MHz, *d*<sub>6</sub>-acetone)  $\delta$  2.94 (d, 2 H, *J* = 12.3 Hz, H-3, H-3'), 5.86 (d, 2 H, *J* = 12.3 Hz, H-2, H-2'), 5.88 (s, 2 H), 5.96 (2 H, d, *J* = 1.8 Hz), 6.86 (4 H, d, *J* = 8.4 Hz), 7.02 (4 H, d, *J* = 8.4 Hz), 7.36 (s, OH), 8.70 (s, OH), 9.72 (s, OH), 11.92 (s, 2 H) ppm; <sup>13</sup>C NMR (75 MHz, *d*<sub>6</sub>-acetone)  $\delta$  49.9 (C-3, C-3'), 83.9 (C-2, C-2'), 95.2, 96.4, 102.6, 115.7, 127.8, 129.6, 158.6, 163.4, 164.7, 166.9, 197.2 ppm; FABMS (*m/z*): 543.2 ([*M*+H]<sup>+</sup>), 271.1 ([*M*/2]<sup>+</sup>). HRMS (SIMS) *m/z* observed 543.1280 for [*M*+H]<sup>+</sup>, calcd 543.1286 for C<sub>30</sub>H<sub>23</sub>O<sub>10</sub>; observed 271.0619 for [*M*/2]<sup>+</sup>, calcd 271.0603 for C<sub>15</sub>H<sub>11</sub>O<sub>5</sub>.

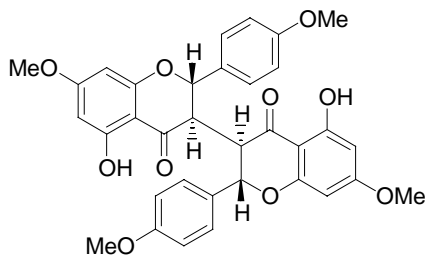

<sup>9</sup> Huang, W. –K.; Zhang, Z. –J. *Kexue Tongbao* **1979**, 24, 24; *Chem. Abstr.* **1979**, 90, 135086m. A melting point of 309 °C (uncorrected, crystallized from ethanol) was recorded therein.

Racemate (*trans, trans, trans*)-2, 2', 3, 3'-Tetrahydro-5, 5'-dihydroxy-7, 7'-dimethoxy-2, 2'-bis(4-methoxyphenyl)-[3, 3'-Bi-4H-1-benzopyran]-4, 4'-dione (*dl*-**13**), mp. 118–120 °C (as trihydrate from petrol. Ether–acetone); IR (KBr,  $\text{cm}^{-1}$ )  $\nu_{\text{max}}$  3118, 1700, 1654, 1574, 1514, 1251, 1155;  $^1\text{H}$  NMR (300 MHz,  $\text{CDCl}_3$ )  $\delta$  2.82 (d, 2 H,  $J = 12$  Hz, H-3, H-3'), 3.77 (s, 6 H, OMe), 3.85 (s, 6 H, OMe), 5.93 (d, 2 H,  $J = 12$  Hz, H-2, H-2'), 5.94 (d, 2 H,  $J = 1.8$  Hz), 6.06 (d, 2 H,  $J = 1.8$  Hz), 6.87 (d, 4 H,  $J = 8.4$  Hz), 7.04 (d, 4 H,  $J = 8.4$  Hz); 11.87 (s, 2 H);  $^{13}\text{C}$  NMR (75 MHz,  $\text{CDCl}_3$ )  $\delta$  49.7 (C-3, C-3'), 55.4, 55.7, 83.5 (C-2, C-2'), 94.0, 95.2, 103.1, 114.3, 124.5, 129.2, 160.4, 162.6, 164.1, 167.9, 196.6 ppm; FABMS ( $m/z$ ): 621.4 ( $[\text{M}+\text{Na}]^+$ ), 599.3 ( $[\text{M}+\text{H}]^+$ ), 299.1 ( $[\text{M}/2]^+$ ). HRMS (SIMS)  $m/z$  observed 599.1914 for  $[\text{M}+\text{H}]^+$ , calcd 599.1912 for  $\text{C}_{34}\text{H}_{31}\text{O}_{10}$ ; observed 299.0959 for  $[\text{M}/2]^+$ , calcd 299.0917 for  $\text{C}_{17}\text{H}_{15}\text{O}_5$ .

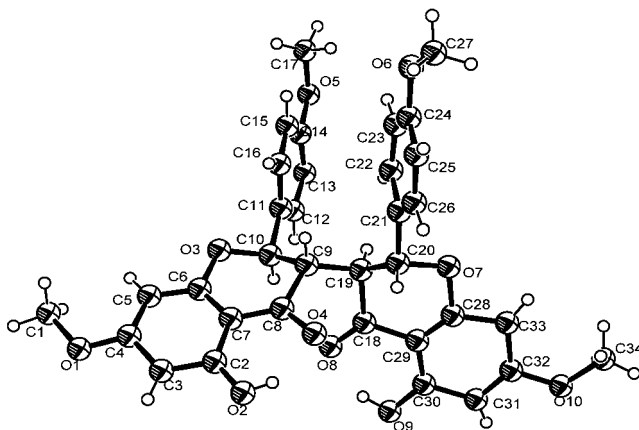

**Table 1.** X-ray crystallographic data of *dl-13*

|                                             |                                                                    |                 |
|---------------------------------------------|--------------------------------------------------------------------|-----------------|
| Color/shape                                 | Colorless/block                                                    |                 |
| Crystal dimension (mm <sup>3</sup> )        | 0.4 × 0.3 × 0.2                                                    |                 |
| Chemical formula                            | C <sub>34</sub> H <sub>30</sub> O <sub>10</sub> ·3H <sub>2</sub> O |                 |
| Formula weight                              | 652.63                                                             |                 |
| Temperature (K)                             | 293 (2)                                                            |                 |
| Crystal system                              | Triclinic                                                          |                 |
| Space group                                 | P1                                                                 |                 |
| Unit cell dimension                         | a = 11.143 (2) Å                                                   | α = 72.17 (3) ° |
|                                             | b = 11.274 (2) Å                                                   | β = 74.90 (3) ° |
|                                             | c = 14.362 (3) Å                                                   | γ = 76.96 (3) ° |
| Volume (Å <sup>3</sup> )                    | 1637.3 (5)                                                         |                 |
| Z                                           | 2                                                                  |                 |
| Density (Mg/m <sup>3</sup> )                | 1.324                                                              |                 |
| Absorption coefficient                      | 0.102                                                              |                 |
| Diffractometer                              | Enraf-Nonius CAD4                                                  |                 |
| Scan                                        | ω/2θ                                                               |                 |
| θ range (°)                                 | 1.52~18.50                                                         |                 |
| Reflections measured                        | 2595                                                               |                 |
| Independent reflections (R <sub>int</sub> ) | 2421 (0.1915)                                                      |                 |
| Observed reflections (I > 2σI)              | 687                                                                |                 |
| Data/restraints/parameters                  | 2421/0/425                                                         |                 |
| Extinction coefficient                      | 0.0259 (16)                                                        |                 |
| Goodness of fit on F <sup>2</sup>           | 0.799                                                              |                 |
| R <sub>1</sub> (I > 2σ (I))                 | 0.0523                                                             |                 |
| WR <sub>2</sub> (all data)                  | 0.1189                                                             |                 |

**Table 2.** HRMS (SIMS) data of a series of 3-haloﬂavanones measured on a *Bruker Daltonics* APEXII 47e FT-ICR spectrometer—observation of dehalogenative dimmers.

| entry | 3-haloﬂavanones                                                                     | $[M+H]^+$<br>(error, ppm)                                | $[M-X]^+$<br>(Br, I) | $\{2 [M-X]+H\}^+$<br>(error, ppm)                  |
|-------|-------------------------------------------------------------------------------------|----------------------------------------------------------|----------------------|----------------------------------------------------|
| 1     | 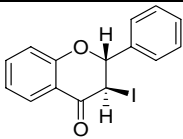   | 350.9882<br>(1.7 ppm)<br><br>$C_{15}H_{12}O_2I$          | 223.0754             | 447.1596<br>(1.1 ppm)<br><br>$C_{30}H_{23}O_4$     |
| 2     |    | 350.9868<br>(2.2 ppm)<br><br>$C_{15}H_{12}O_2I$          | 223.0750             | 447.1569<br>(4.9 ppm)<br><br>$C_{30}H_{23}O_4$     |
| 3     |    | 303.0020<br>304.9998<br>(1.6 ppm)<br>$C_{15}H_{12}O_2Br$ | 223.0755             | 447.1603<br>(2.7 ppm)<br><br>$C_{30}H_{23}O_4$     |
| 4     |   | 380.9970<br>(3.1 ppm)<br><br>$C_{16}H_{14}O_3I$          | 253.0859             | 507.1783<br>(3.8 ppm)<br><br>$C_{32}H_{27}O_6$     |
| 5     |  | 411.0092<br>(0.9 ppm)<br><br>$C_{17}H_{16}O_4I$          | 283.0968             | 567.0996<br>(7.3 ppm)<br><br>$C_{34}H_{31}O_8$     |
| 6     |  | 441.0154<br>(8.8 ppm)<br><br>$C_{18}H_{18}O_5I$          | 313.1036             | 627.2133<br>(14.6 ppm)<br><br>$C_{36}H_{35}O_{10}$ |
| 7     |  | 441.0085<br>(2.4 ppm)<br><br>$C_{18}H_{18}O_5I$          | 313.1034             | 627.2274<br>(7.8 ppm)<br><br>$C_{36}H_{35}O_{10}$  |
| 8     |  | 393.0292<br>395.0269<br>(10 ppm)<br>$C_{18}H_{18}O_5Br$  | 313.1053             | 627.1821<br>(64 ppm)<br><br>$C_{36}H_{35}O_{10}$   |



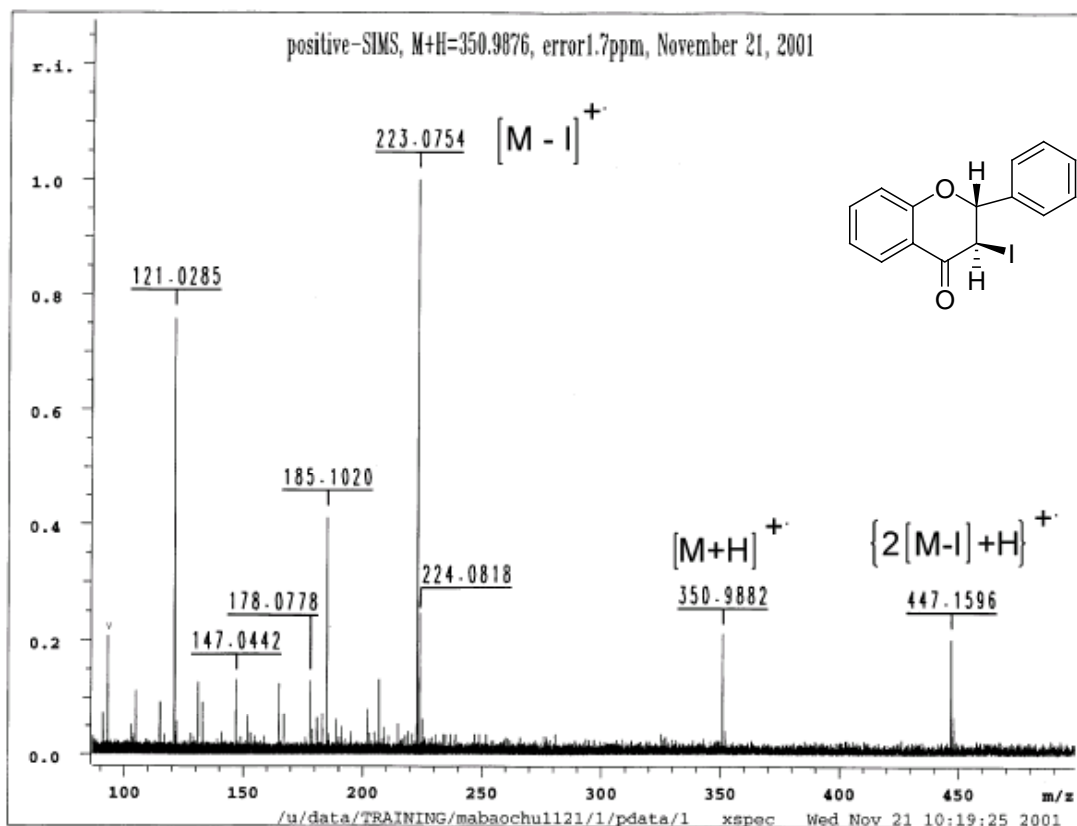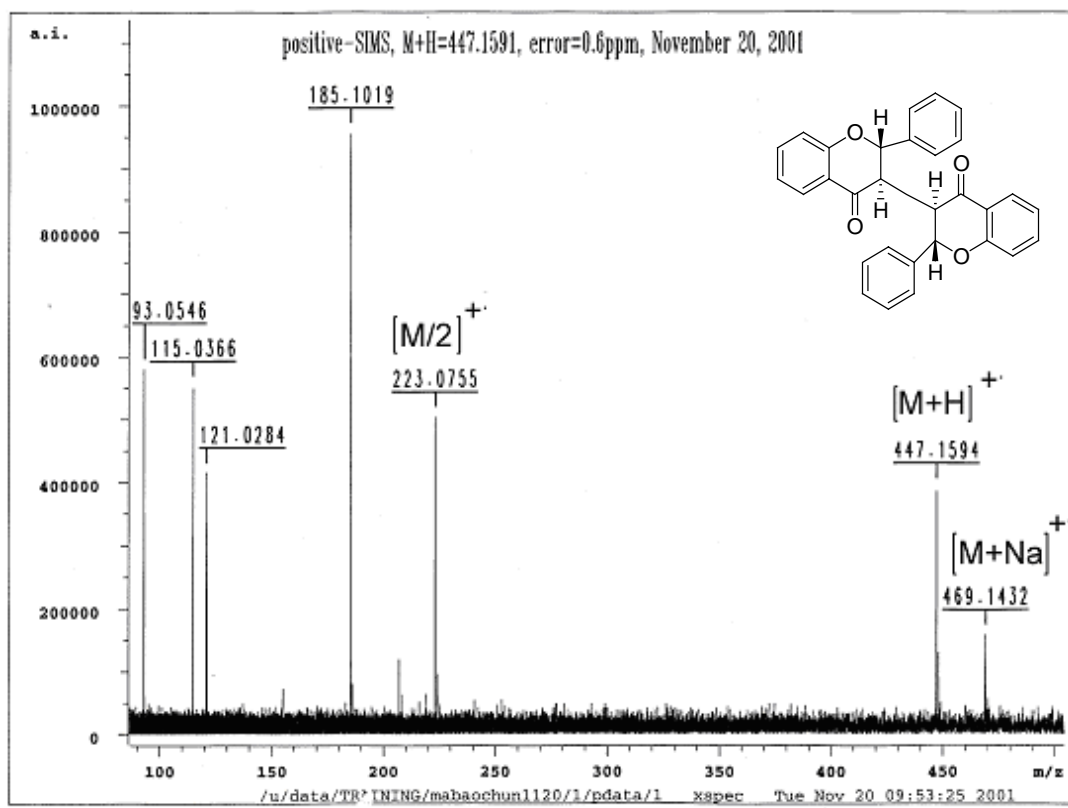

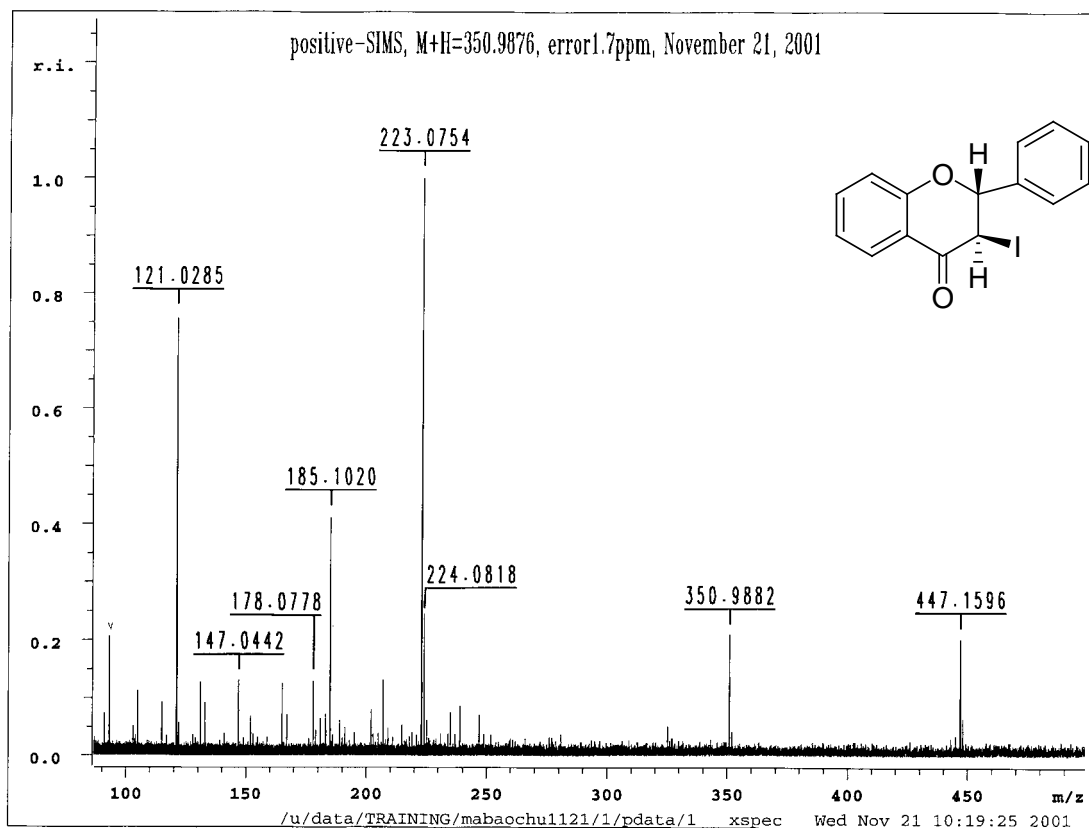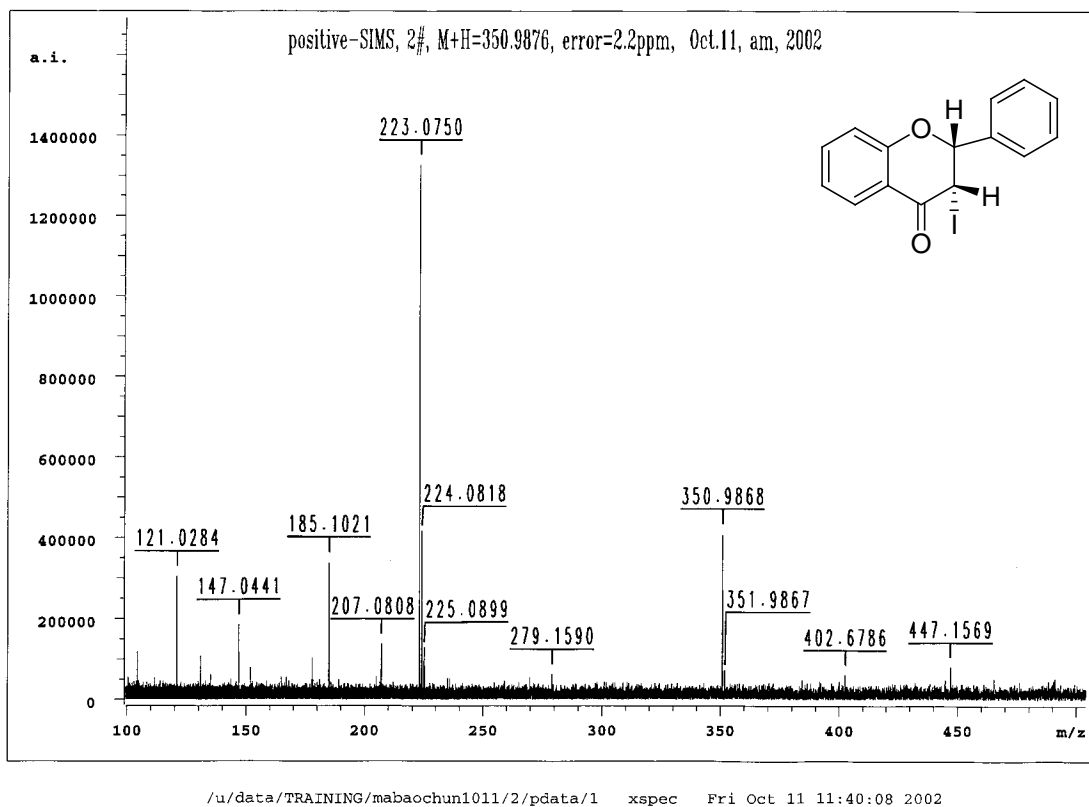

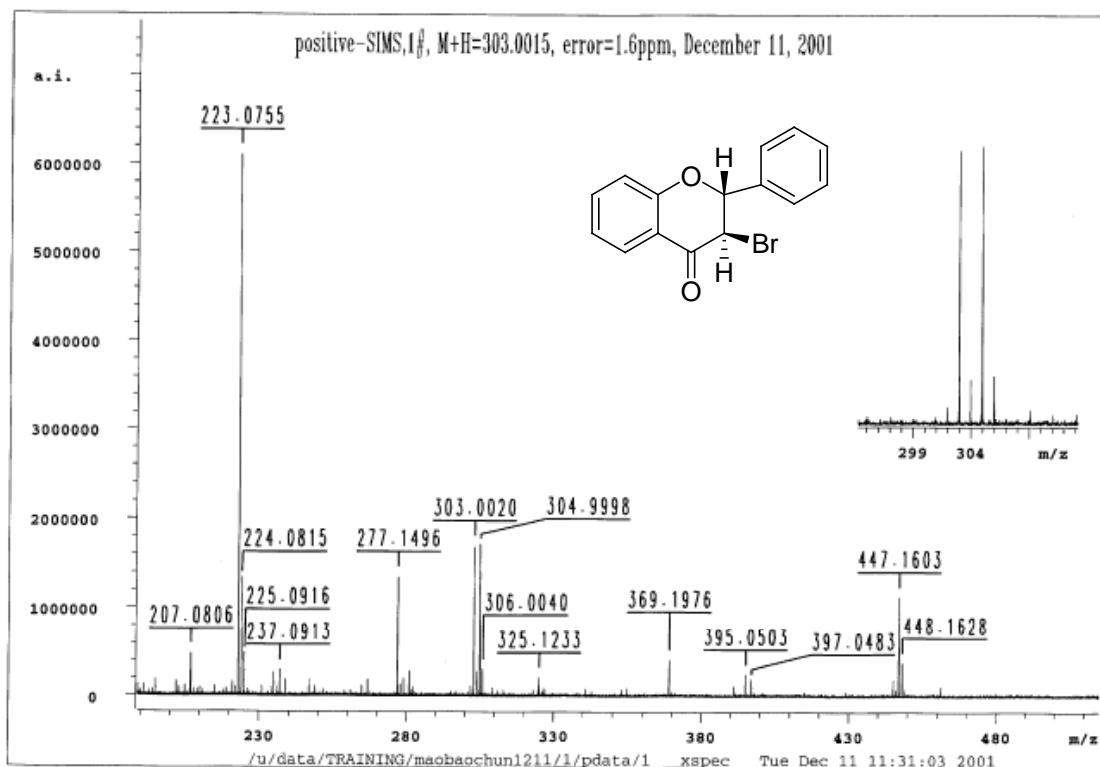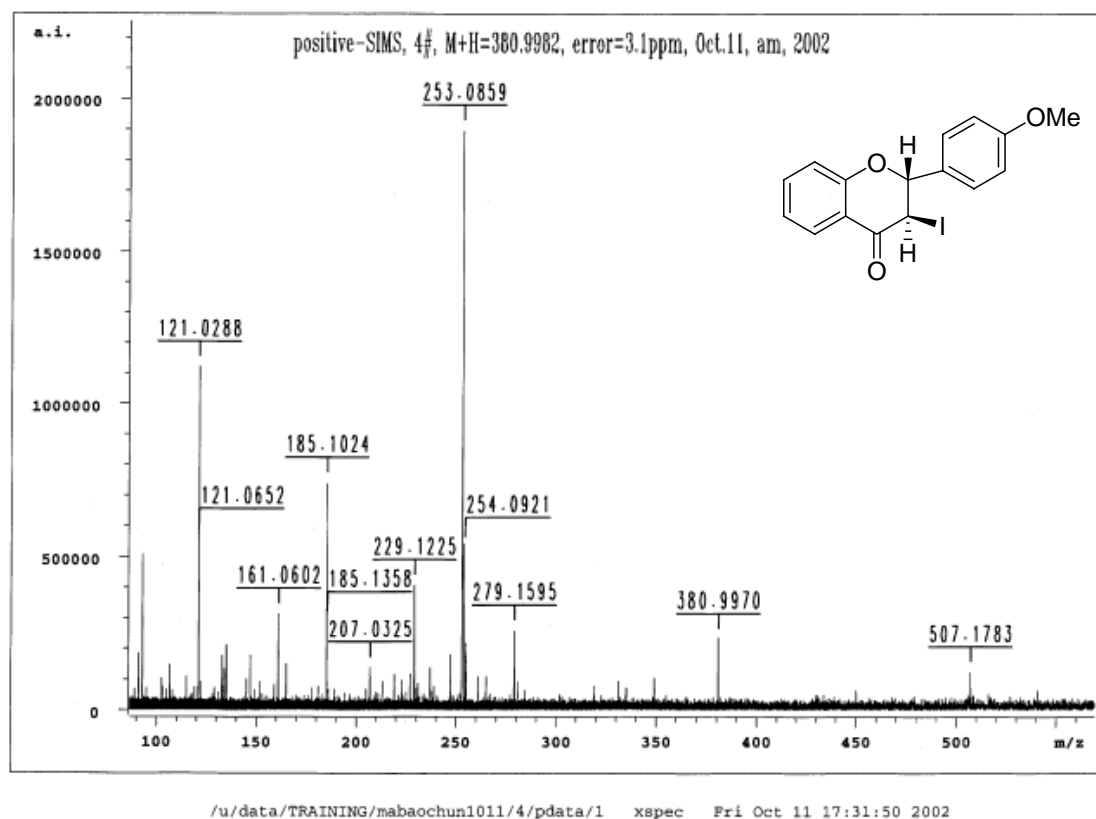

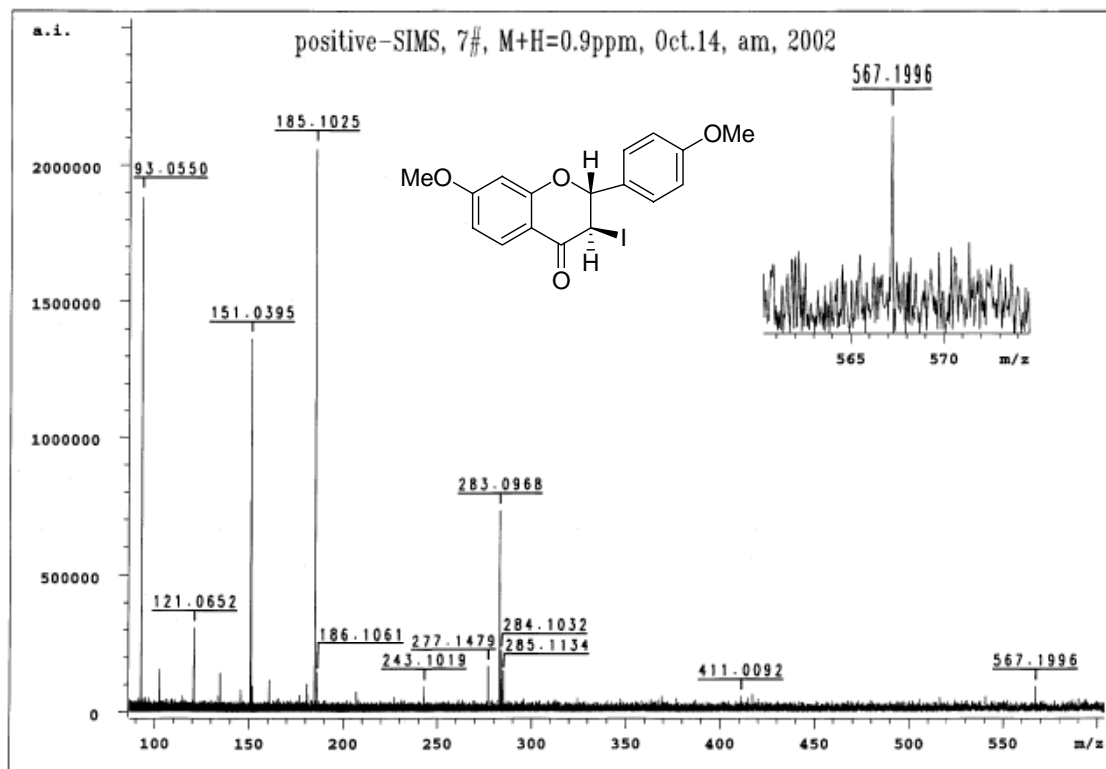

/u/data/TRAINING/mabaochun1011/7/pdata/1 xspec Mon Oct 14 16:19:48 2002

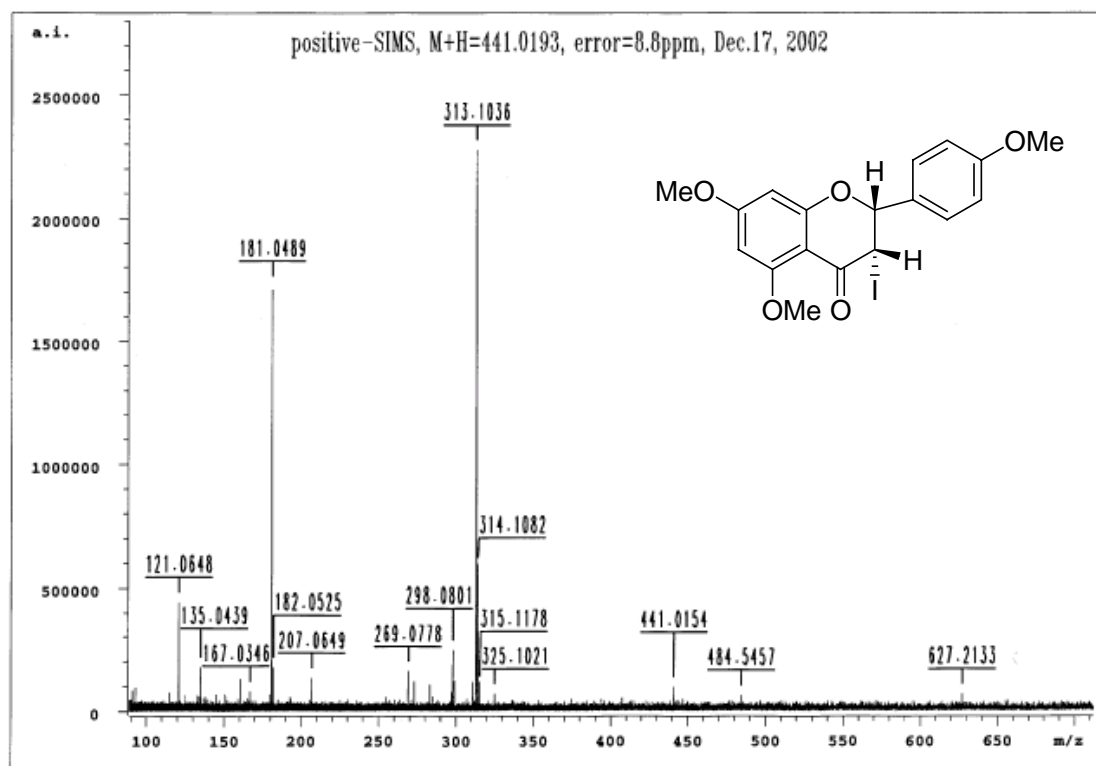

/u/data/TRAINING/mabaochun1217/1/pdata/1 xspec Tue Dec 17 15:54:14 2002

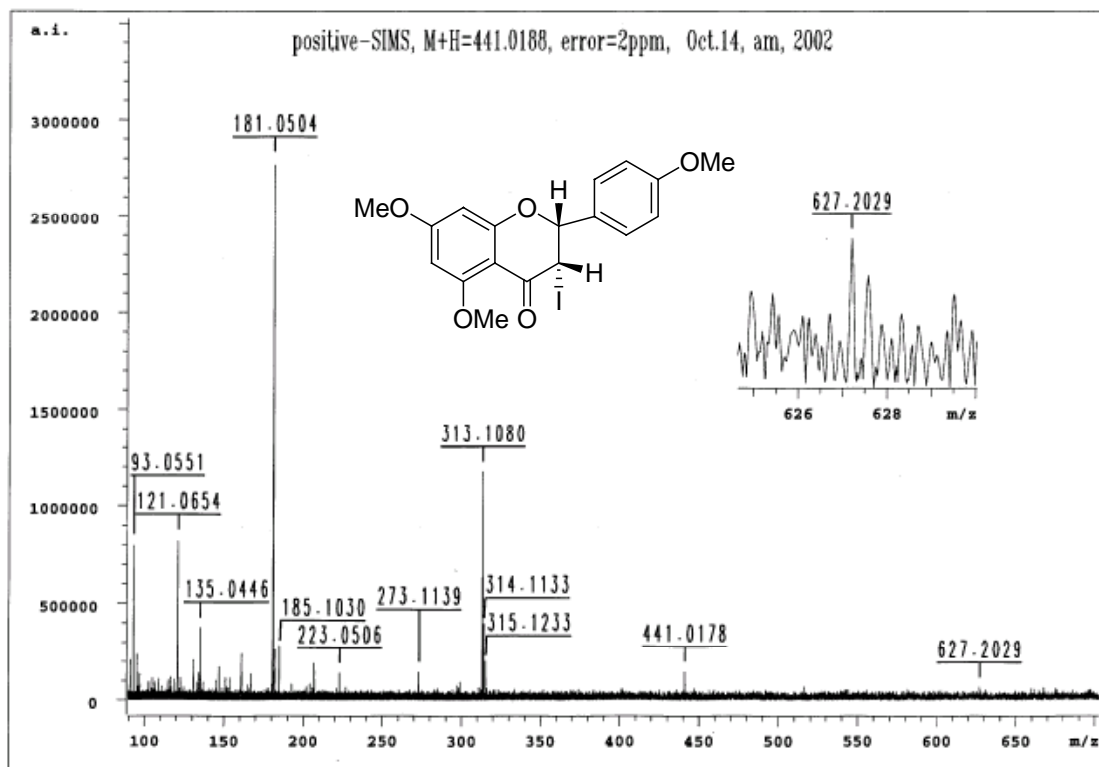

/u/data/TRAINING/mabaochun1011/10-1/pdata/1 xspec Mon Oct 14 17:53:54 2002

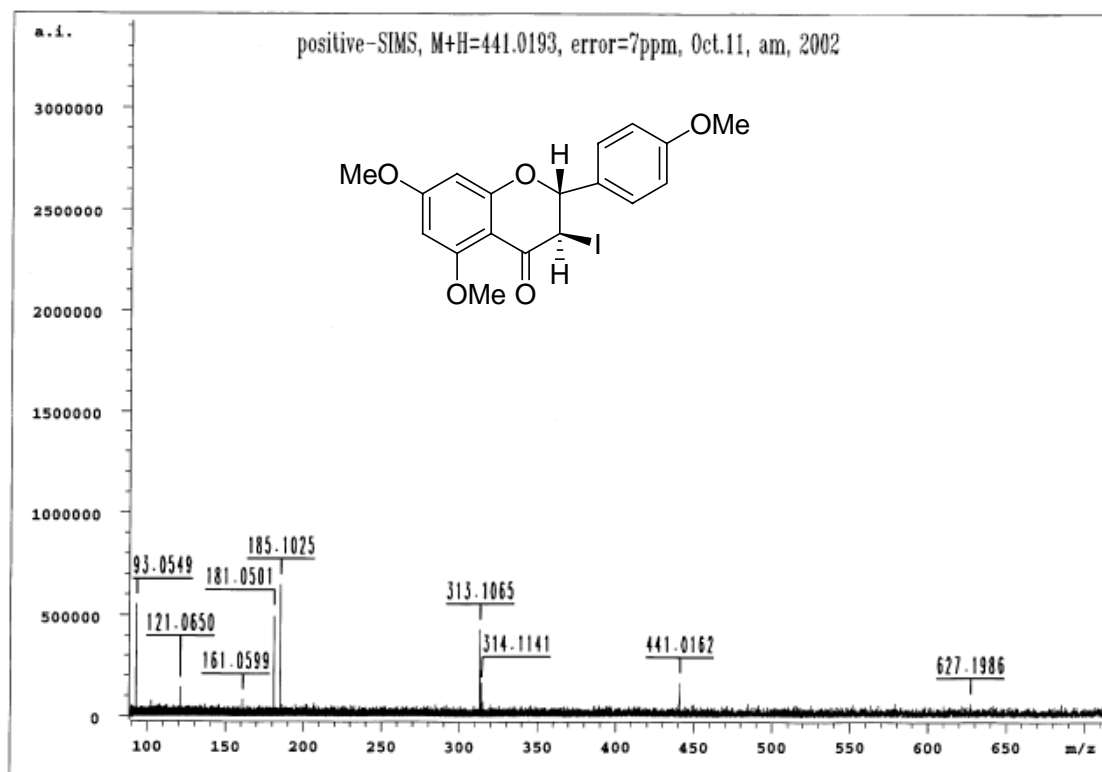

/u/data/TRAINING/mabaochun1011/6-1/pdata/1 xspec Tue Dec 17 16:10:59 2002

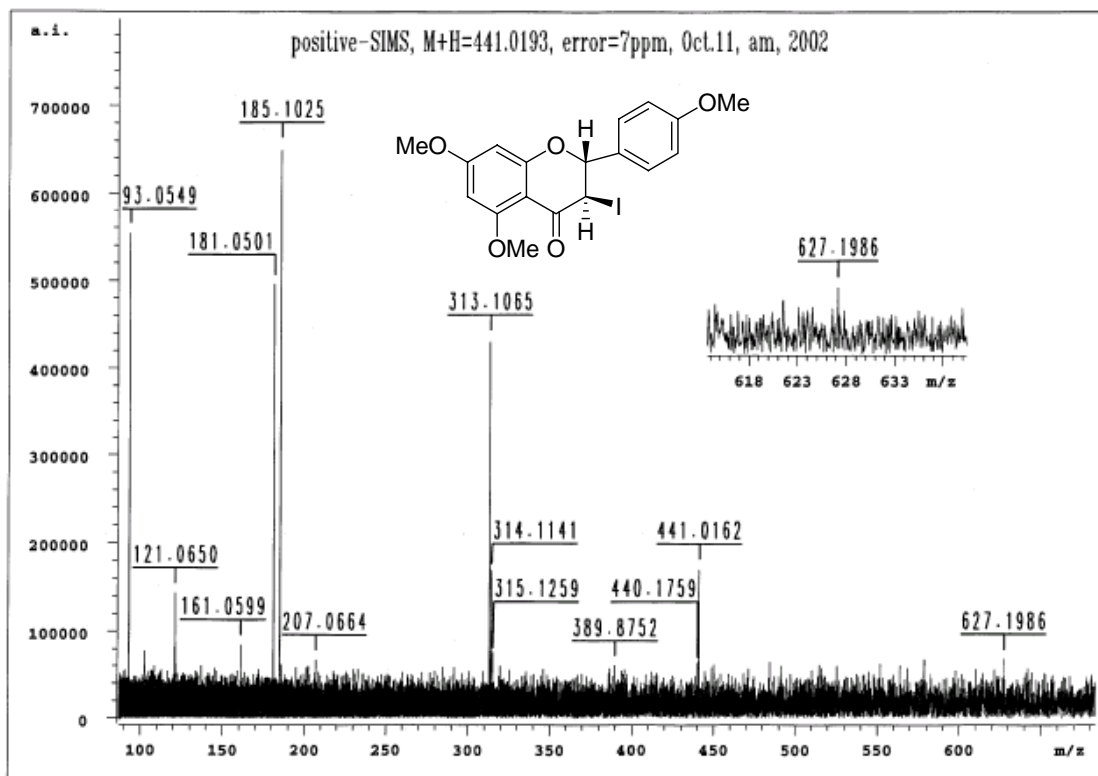

/u/data/TRAINING/mabaochun1011/6-1/pdata/1 xspec Fri Oct 11 18:13:26 2002

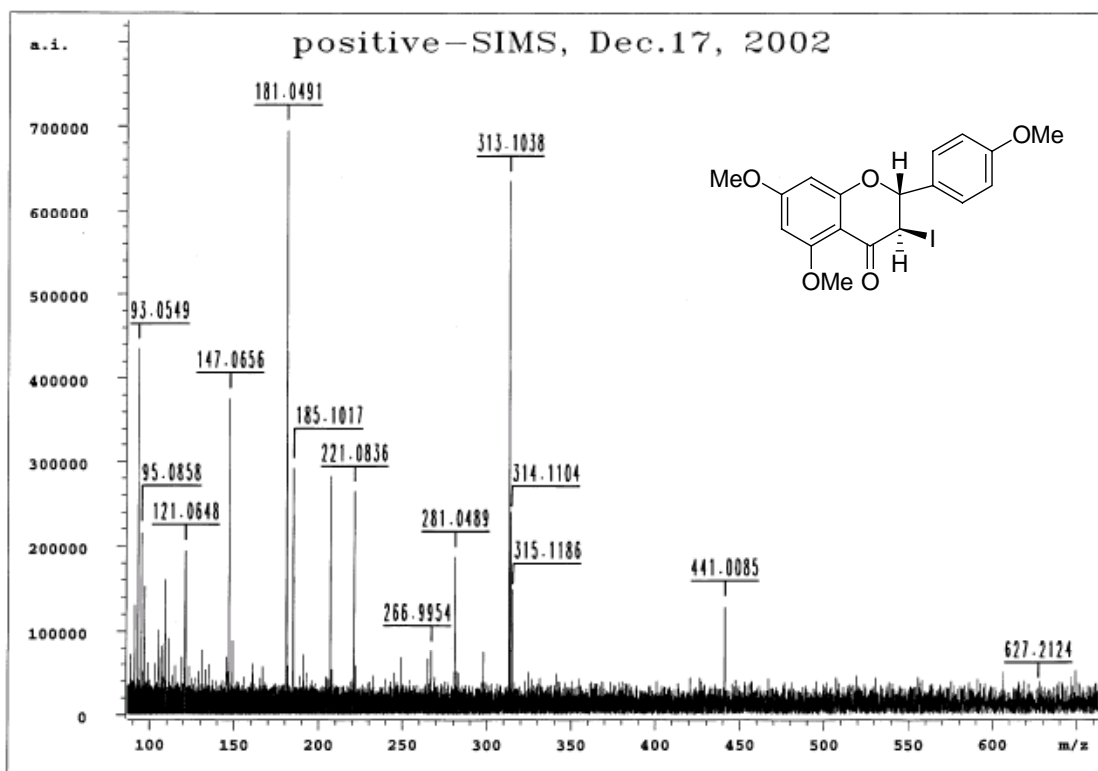

/u/data/TRAINING/mabaochun1217/5/pdata/1 xspec Tue Dec 17 16:03:58 2002

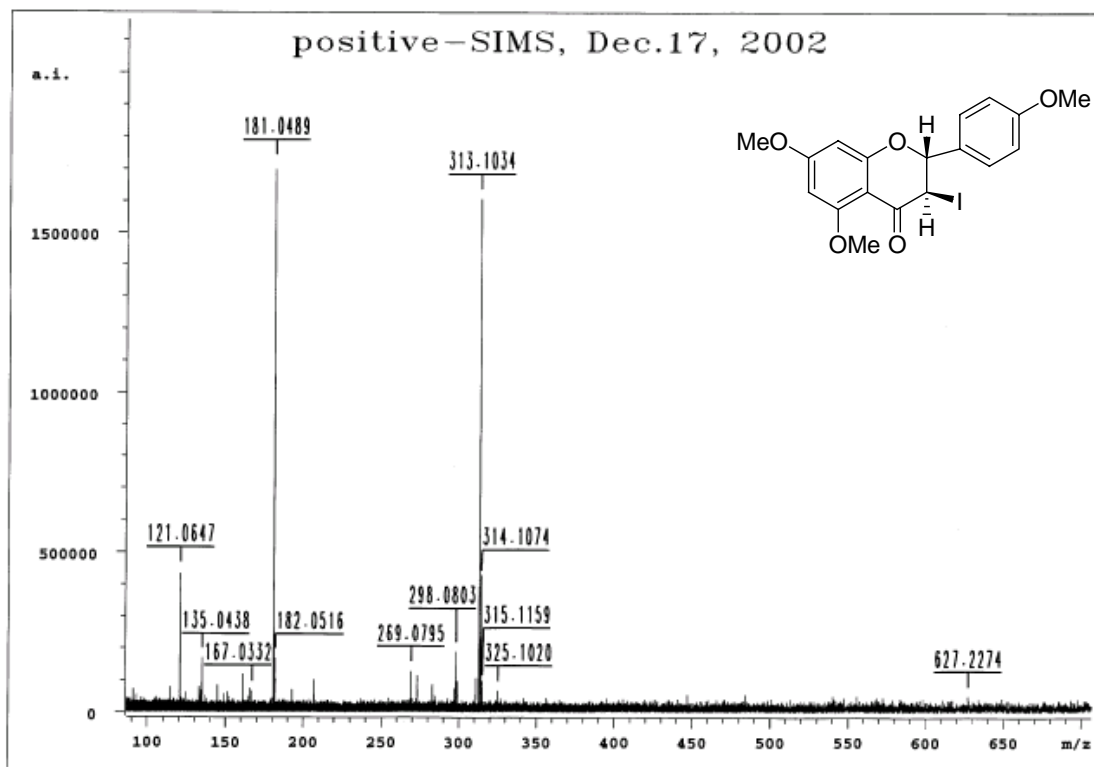

/u/data/TRAINING/mabaochun1217/2/pdata/1 xspec Tue Dec 17 15:56:36 2002

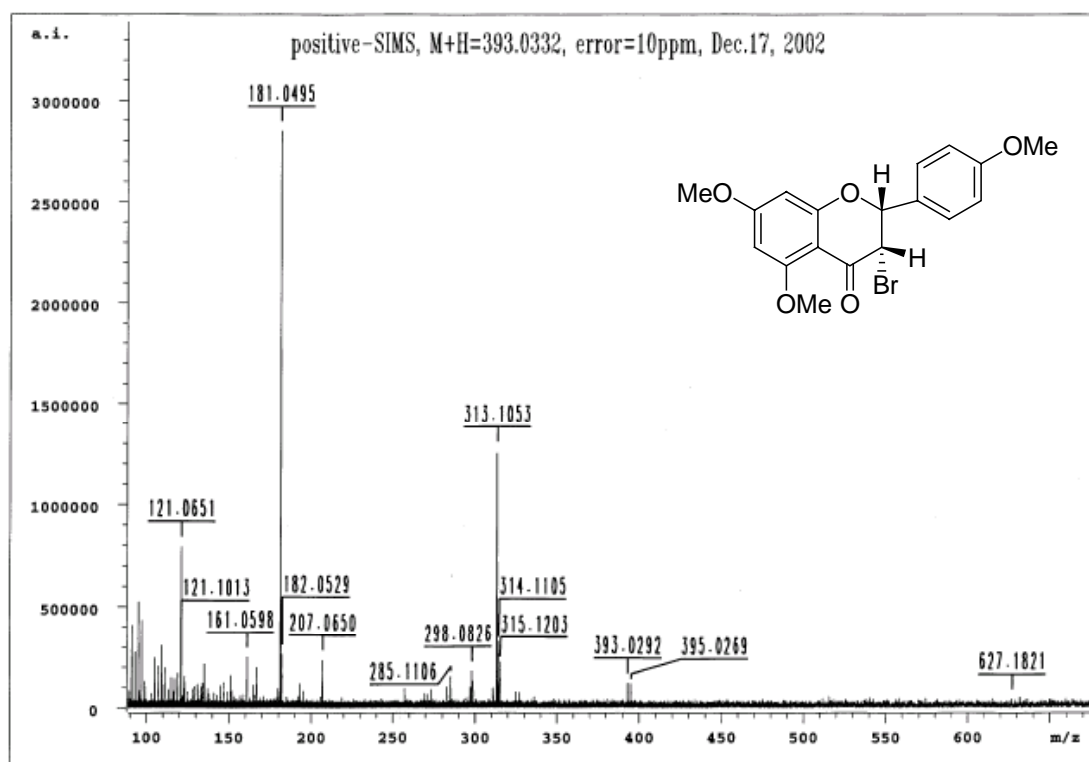

/u/data/TRAINING/mabaochun1217/7/pdata/1 xspec Tue Dec 17 16:08:14 2002
